# Supplementary material for: Evaluation of New Potential Inflammatory Markers in Patients with Nonvalvular Atrial Fibrillation
Source: MDPI journal article supplement (doi:10.3390/ijms24043326), 2023-02-07
Supplement: s1 [file s1]

## *Supplementary Material*

**Supplementary Table S1.** Plasma levels of inflammatory mediators comparing controls and NVAf patients.

| <b>Inflammatory mediators<br/>(pg/mL)</b> | <b>Controls<br/>(N = 50)</b> | <b>NVAf<br/>(N = 55)</b> | <b><i>p</i> value</b> |
|-------------------------------------------|------------------------------|--------------------------|-----------------------|
| IL-2                                      | 1.26 (0.37)                  | 3.04 (1.38)              | <b>&lt; 0.001</b>     |
| IL-4                                      | 1.21 (0.30)                  | 2.99 (1.63)              | <b>&lt; 0.001</b>     |
| IL-6                                      | 1.72 (1.05)                  | 7.96 (8.78)              | <b>&lt; 0.001</b>     |
| IL-10                                     | 0.87 (0.44)                  | 2.40 (1.30)              | <b>&lt; 0.001</b>     |
| TNF                                       | 1.25 (0.44)                  | 3.06 (1.60)              | <b>&lt; 0.001</b>     |
| IFN- $\gamma$                             | 1.12 (0.39)                  | 2.86 (1.44)              | <b>&lt; 0.001</b>     |
| IL-8                                      | 3.60 (1.60)                  | 3.43 (2.14)              | 0.182                 |
| RANTES                                    | 2031.36 (2106.59)            | 2331.56 (2088)           | 0.987                 |
| MIG                                       | 94.45 (91.39)                | 160.95 (184.65)          | <b>0.032</b>          |
| MCP-1                                     | 59.73 (42.50)                | 65.60 (65.65)            | 0.902                 |
| IP-10                                     | 105.72 (74.20)               | 128.67 (110.38)          | <b>0.008</b>          |
| TGF- $\beta$                              | 1.68 (0.86)                  | 1.48 (0.75)              | 0.476                 |
| ADAMTS13                                  | 2.01 (0.64)                  | 2.18 (1.13)              | 0.226                 |
| GDF-15                                    | 0.01 (0.02)                  | 0.03 (0.09)              | <b>0.006</b>          |
| Myoglobin                                 | 0.58 (0.66)                  | 0.61 (0.49)              | 0.953                 |
| sICAM-1                                   | 115.74 (1166.96)             | 414.88 (1515.95)         | 0.070                 |
| MPO                                       | 0.20 (0.34)                  | 0.25 (0.42)              | <b>0.005</b>          |
| p-selectin                                | 0.25 (0.18)                  | 0.28 (0.07)              | 0.340                 |
| NGAL                                      | 1.28 (0.84)                  | 1.49 (0.83)              | <b>0.042</b>          |
| sVCAM-1                                   | 6.22 (4.68)                  | 6.86 (4.84)              | 0.594                 |
| SAA                                       | 82.85 (214.81)               | 176.78 (1256.82)         | <b>0.027</b>          |

Mann-Whitney *U* test were performed for non-normal continuous variables (values expressed as median and interquartile range). ADAMTS13 = disintegrin and metalloproteinase with thrombospondin type 1 motif, 13; GDF = growth differentiation factor; IFN- $\gamma$  = Interferon-gamma; IL = interleukin; IP-10 = interferon-gamma-induced protein; MCP = monocyte chemoattractant protein; MIG = monokine induced by interferon-gamma; MPO = myeloperoxidase; NGAL = neutrophil gelatinase-associated lipocalin; RANTES = regulated on activation, normal T cell expressed and secreted; SAA = serum amyloid A; sICAM = soluble intercellular adhesion molecule; sVCAM-1 = soluble vascular cell adhesion protein; TGF- $\beta$  = transforming growth factor-beta; TNF = tumor necrosis factor. Statistically significant differences between groups are indicated in bold fonts, with a significance level of  $p < 0.05$ .

**Supplementary Table S2.** Univariate logistic regression for inflammatory mediators.

| Inflammatory mediators (pg/mL) | OR (95% CI)                                            | <i>p</i> value    |
|--------------------------------|--------------------------------------------------------|-------------------|
| IL-2                           | 3.63 x 10 <sup>5</sup> (91.15-1.45 x 10 <sup>9</sup> ) | <b>0.002</b>      |
| IL-4                           | 7.05 x 10 <sup>3</sup> (80.53-6.19 x 10 <sup>5</sup> ) | <b>&lt; 0.001</b> |
| IL-6                           | 1.74 (1.36-2.22)                                       | <b>&lt; 0.001</b> |
| IL-10                          | 13.34 (4.85-36.7)                                      | <b>&lt; 0.001</b> |
| TNF                            | 11.03 (4.41-27.6)                                      | <b>&lt; 0.001</b> |
| IFN- $\gamma$                  | 8.74 x 10 <sup>3</sup> (89.87-8.5 x 10 <sup>5</sup> )  | <b>&lt; 0.001</b> |
| MIG                            | 1.01 (0.99-1.0)                                        | 0.346             |
| IP-10                          | 1.01 (1.00-1.01)                                       | <b>0.016</b>      |
| GDF-15                         | 49.59 (0.18-1.41 x 10 <sup>4</sup> )                   | 0.176             |
| MPO                            | 0.97 (0.73-1.28)                                       | 0.834             |
| NGAL                           | 1.43 (0.77-2.65)                                       | 0.255             |
| SAA                            | 1.00 (1.00-1.00)                                       | 0.457             |

CI = confidence interval; GDF = growth differentiation factor; IFN- $\gamma$  = Interferon-gamma; IL = interleukin; IP-10 = interferon-gamma-induced protein; MIG = monokine induced by interferon-gamma; MPO = myeloperoxidase; NGAL = neutrophil gelatinase-associated lipocalin; OR = odds ratio; SAA = serum amyloid A; TNF = tumor necrosis factor. Statistically significant differences are indicated in bold fonts, with a significance level of  $p < 0.05$ .

**Table S3.** Validity of multivariate logistic regression models.

| Inflammatory mediators (pg/mL) | Model 1  |    |                   |                              | Model 2  |    |                   |                              |
|--------------------------------|----------|----|-------------------|------------------------------|----------|----|-------------------|------------------------------|
|                                | $\chi^2$ | df | <i>p</i> value    | R <sup>2</sup><br>Nagelkerke | $\chi^2$ | df | <i>p</i> value    | R <sup>2</sup><br>Nagelkerke |
| IL-2                           | 134.975  | 5  | <b>&lt; 0.001</b> | 0.970                        | 128.915  | 10 | <b>&lt; 0.001</b> | 1.000                        |
| IL-4                           | 126.114  | 5  | <b>&lt; 0.001</b> | 0.938                        | 128.915  | 10 | <b>&lt; 0.001</b> | 1.000                        |
| IL-6                           | 67.690   | 5  | <b>&lt; 0.001</b> | 0.639                        | 87.653   | 10 | <b>&lt; 0.001</b> | 0.814                        |
| IL-10                          | 72.542   | 5  | <b>&lt; 0.001</b> | 0.670                        | 68.010   | 10 | <b>&lt; 0.001</b> | 0.692                        |
| TNF                            | 77.671   | 5  | <b>&lt; 0.001</b> | 0.702                        | 79.315   | 10 | <b>&lt; 0.001</b> | 0.765                        |
| IFN- $\gamma$                  | 130.408  | 5  | <b>&lt; 0.001</b> | 0.954                        | 128.915  | 10 | <b>&lt; 0.001</b> | 1.000                        |
| IP-10                          | 40.672   | 5  | <b>&lt; 0.001</b> | 0.432                        | 46.941   | 10 | <b>&lt; 0.001</b> | 0.528                        |

IFN- $\gamma$  = Interferon-gamma; IL = interleukin; IP-10 = interferon-gamma-induced protein; TNF = tumor necrosis factor. Statistically significant differences are indicated in bold fonts, with a significance level of  $p < 0.05$ .
